CORRECTION

# Correction: Contact Trees: Network Visualization beyond Nodes and Edges

Arnaud Sallaberry, Yang-chih Fu, Hwai-Chung Ho, Kwan-Liu Ma

The following information is missing from the Funding section: This work is also supported in part by UC Davis RISE program and U.S. National Science Foundation through grants IIS-1528203 and IIS-1320229.

## Reference

1. Sallaberry A, Fu Y-c, Ho H-C, Ma K-L (2016) Contact Trees: Network Visualization beyond Nodes and Edges. PLoS ONE 11(1): e0146368. doi:[10.1371/journal.pone.0146368](https://doi.org/10.1371/journal.pone.0146368) PMID: [26784350](https://pubmed.ncbi.nlm.nih.gov/26784350/)

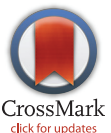

## OPEN ACCESS

**Citation:** Sallaberry A, Fu Y-c, Ho H-C, Ma K-L (2016) Correction: Contact Trees: Network Visualization beyond Nodes and Edges. PLoS ONE 11(2): e0149324. doi:[10.1371/journal.pone.0149324](https://doi.org/10.1371/journal.pone.0149324)

**Published:** February 9, 2016

**Copyright:** © 2016 Sallaberry et al. This is an open access article distributed under the terms of the [Creative Commons Attribution License](https://creativecommons.org/licenses/by/4.0/), which permits unrestricted use, distribution, and reproduction in any medium, provided the original author and source are credited.
